# Supplementary material for: Systemic Propagation of a Fluorescent Infectious Clone of a Polerovirus Following Inoculation by Agrobacteria and Aphids
Source: MDPI journal article supplement (doi:10.3390/v9070166), 2017-06-29
Supplement: s1 [file s1]

**Table S1: List of primers**

| Primer name       | Pimer sequence 5'> 3'       |
|-------------------|-----------------------------|
| Reverse primer RP | ATTGTCGACACCGAAGTGCCGTA     |
| Forward primer FP | AGGCTCATCCGGTTCCGT          |
| 5'RT-Nco.fw       | GGTCTAGACCATGGCAGTCTCAACC   |
| 5'RT-Bam.rev      | GGGGATCCTCTTTTGCAGCGTGTCTAG |
| 3'RT-Eco.fw       | GAGAATTCGGCGAAGACCCCGAC     |
| 3'RT-Sal.rev      | CAGGTCGACTAGACACCGAAGTG     |
| EGFP-Bam.fw       | GTGGATCCTTATGGTGAGCAAGGGC   |
| EGFP-Eco.rev      | TCGAATTCCTTGTACAGCTCGTCC    |
