# Supplementary material for: Systemic Propagation of a Fluorescent Infectious Clone of a Polerovirus Following Inoculation by Agrobacteria and Aphids
Source: MDPI journal article supplement (doi:10.3390/v9070166), 2017-06-29
Supplement: s1 [file s1]

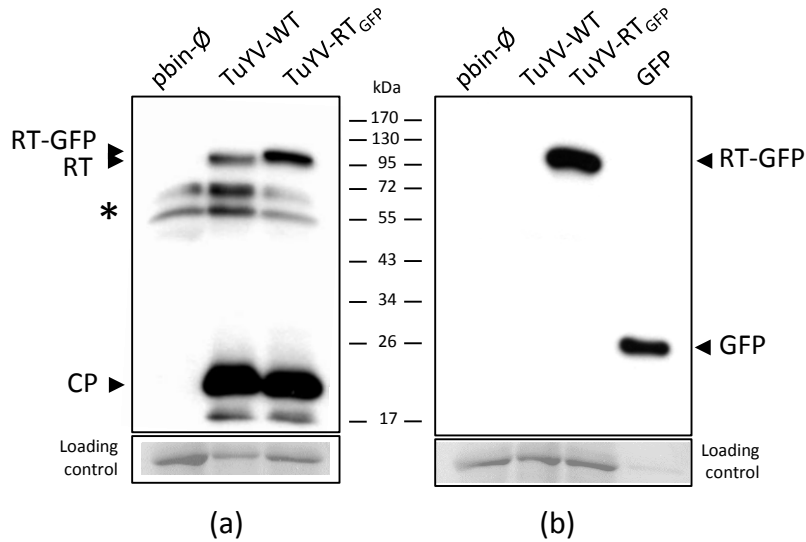

**Figure S1:** Analysis of TuYV-RT<sub>GFP</sub> multiplication in infiltrated leaves of *N. benthamiana*. Western blot analysis of total protein extracts prepared 5 days post-inoculation with agrobacteria containing TuYV-RT<sub>GFP</sub> or TuYV-WT constructs or a binary plasmid with no insert (pbin-Ø). Two acrylamide gels were loaded in parallel with the same protein extracts and transferred onto membranes. Membrane (a) was incubated with antibodies raised against TuYV-CP and the membrane (b) was incubated with an antiserum directed against GFP. \*: non-specific products. Position of the molecular markers (in kDa) is indicated. Ponceau red stained proteins serve as a loading control.
