# Supplementary material for: Systemic Propagation of a Fluorescent Infectious Clone of a Polerovirus Following Inoculation by Agrobacteria and Aphids
Source: Viruses. 2017 Jun 29;9(7):166. doi: 10.3390/v9070166 (PMC5537658; doi:10.3390/v9070166)
Supplement: Supplementary file 1 [file viruses-09-00166-s001.zip]

Archive with 5 entries (5 files):
- Table S1 TuYV-GFP.pdf
- TuYV-GFP FigS1.pdf
- TuYV-GFP FigS2.pdf
- TuYV-GFP Figure S3 revised.pdf
- TuYV-GFP FigS4 revised.pdf
